# Supplementary figures and images for: Integrative Taxonomy Supports Two New Species of Rhodiola (Crassulaceae) in Xizang, China
Source: MDPI journal article supplement (doi:10.3390/d14040289), 2022-04-12

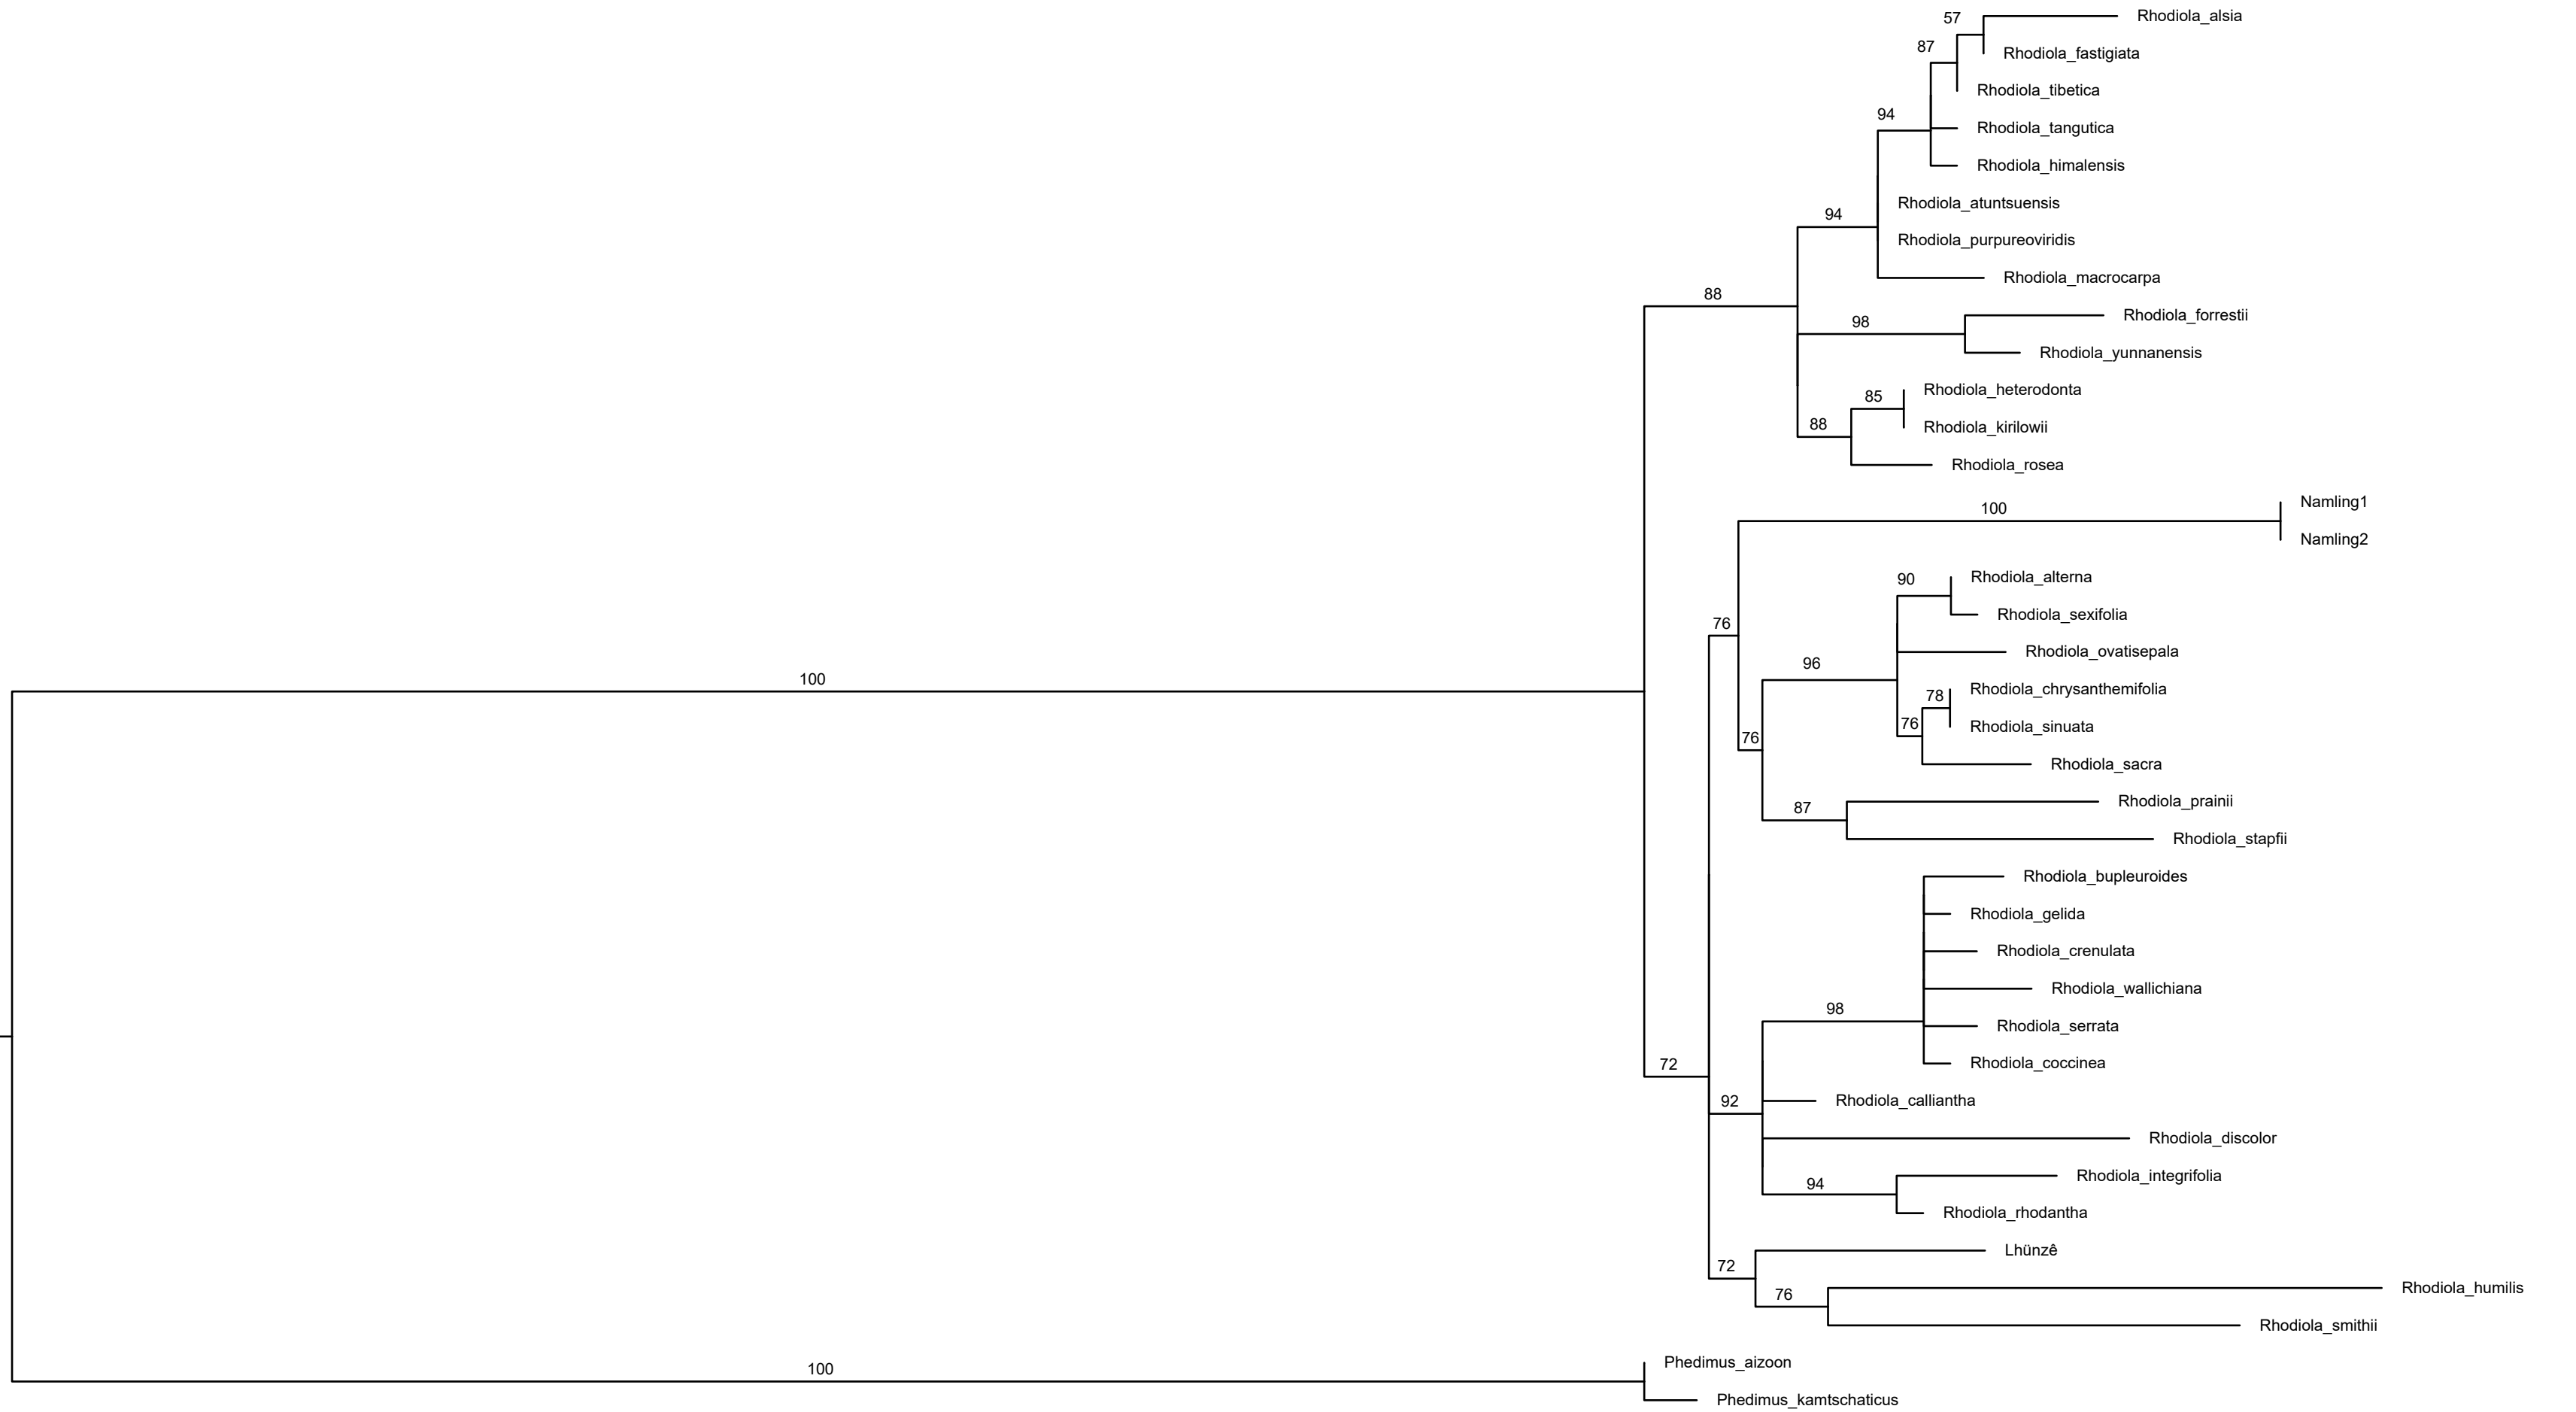

0.03

Supplement: s1 [file s1]
